# Supplementary material for: Radiomics-guided deep neural networks stratify lung adenocarcinoma prognosis from CT scans
Source: PubMed Central journal article supplement (PMC8590002; doi:10.1038/s42003-021-02814-7), 2021-11-12
Supplement: 42003_2021_2814_MOESM1_ESM.pdf [file 42003_2021_2814_MOESM1_ESM.pdf]

## Supplementary Figures

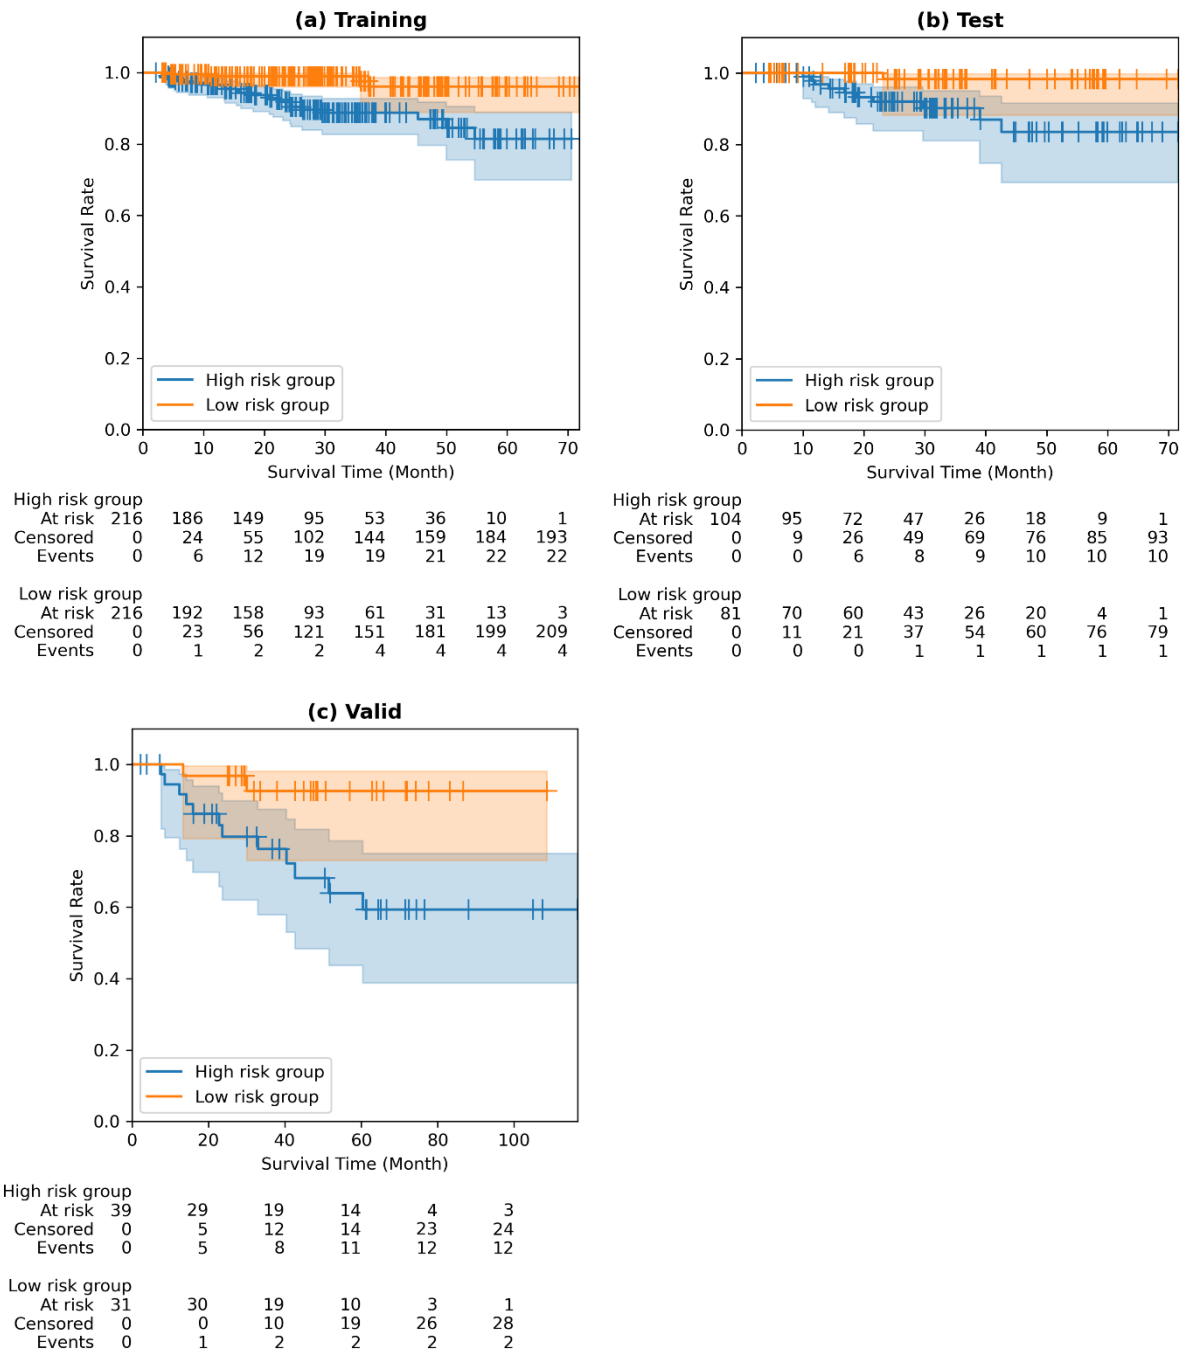

**Figure S1.** Kaplan–Meier plots of radiomics-guided DL model using Dense network. (a) Kaplan–Meier plot of training cohort, hazard ratio of 4.4383 (95% CI of 2.0468–9.6241), p-value of 0.0003, and C-index of 0.7410, (b) Kaplan–Meier plot of test cohort, hazard ratio of 5.3620 (95% CI of 1.7011–18.5774), p-value of 0.0116, and C-index of 0.0.7214, (c) Kaplan–Meier plot of validation cohort, hazard ratio of 4.2277 (95% CI of 1.4800–12.0768), p-value of 0.0153, and C-index of 0.7112.

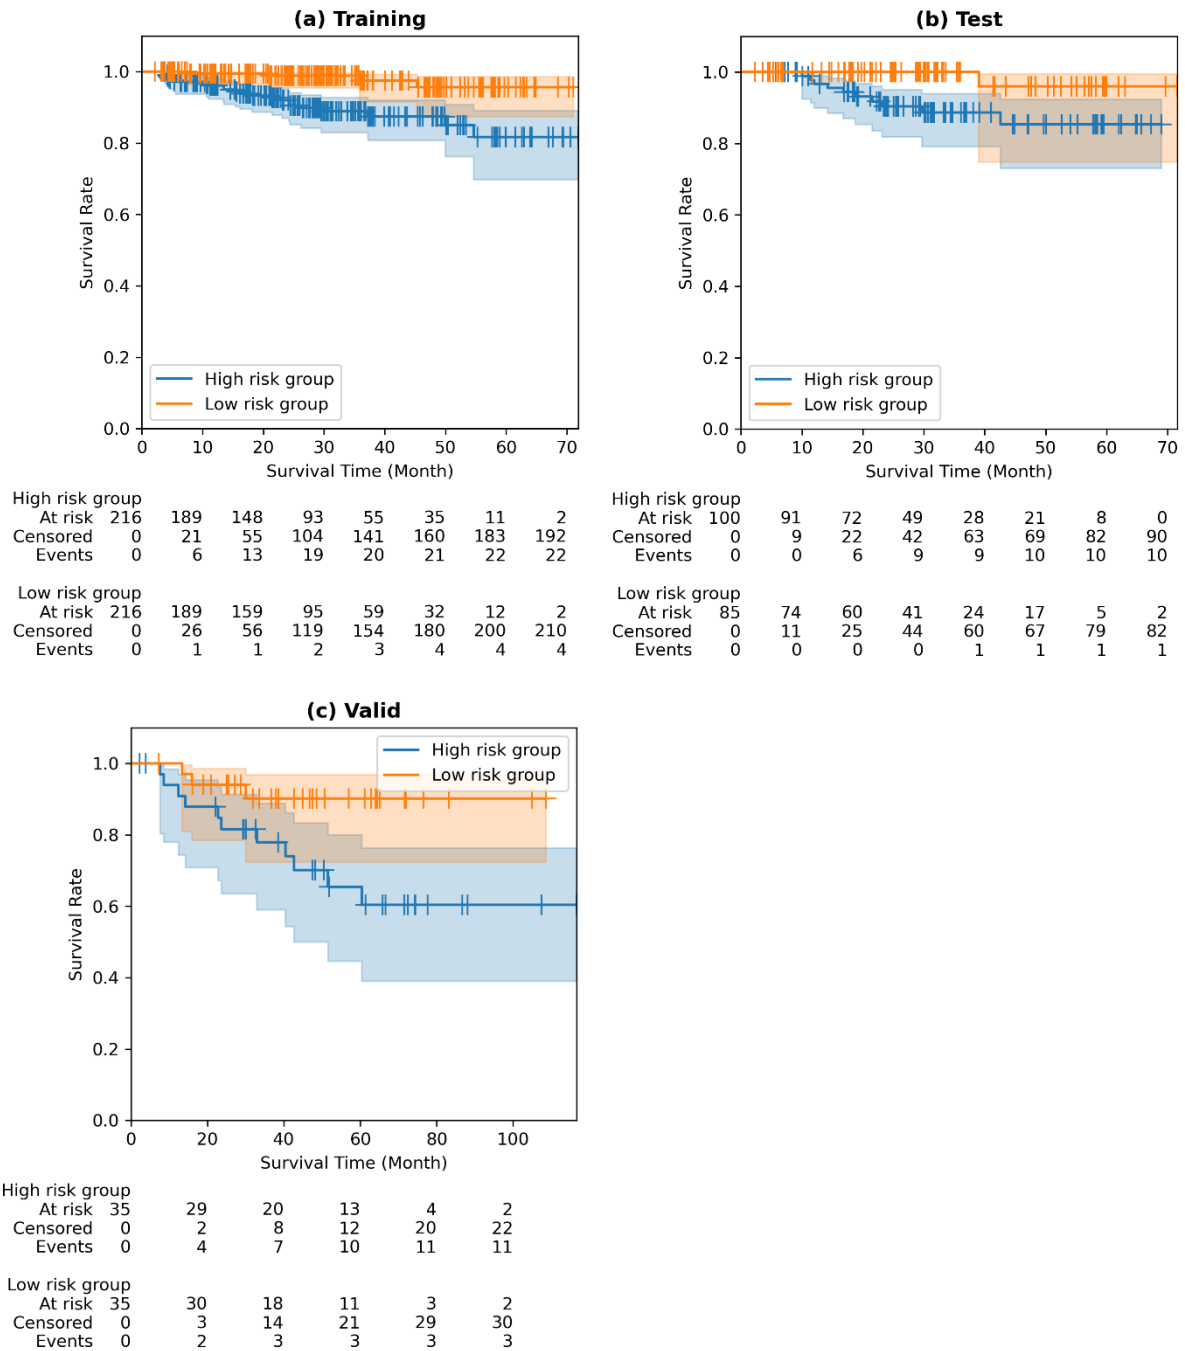

**Figure S2.** Kaplan–Meier plots of radiomics-guided DL model using VGG network. (a) Kaplan–Meier plot of training cohort, hazard ratio of 4.2454 (95% CI of 1.9658–9.1683), p-value of 0.0005, and C-index of 0.7660, (b) Kaplan–Meier plot of test cohort, hazard ratio of 4.7060 (95% CI of 1.4333–15.4520), p-value of 0.0244, and C-index of 0.0.8009, (c) Kaplan–Meier plot of validation cohort, hazard ratio of 3.5488 (95% CI of 1.2409–10.1494), p-value of 0.0362, and C-index of 0.6757.

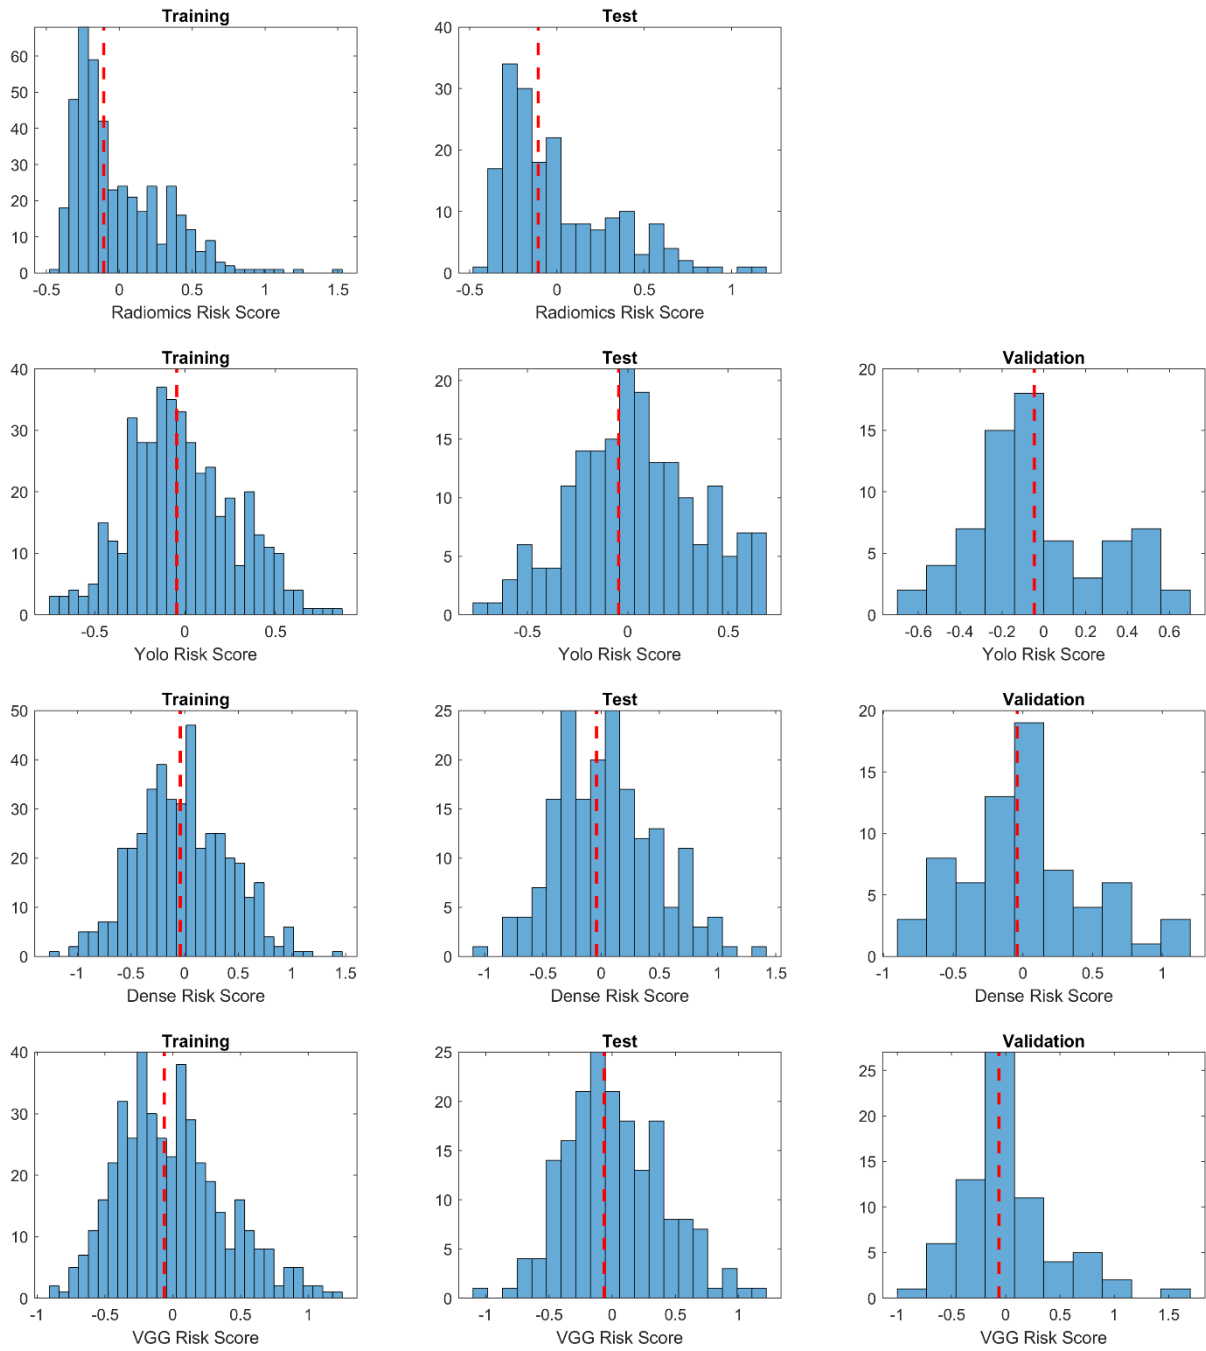

**Figure S3.** Plot of RRS and DRS for various approaches. The red dotted line is the median cut-off.

## Supplementary Tables

**Table S1.** DL risk score model using Dense network for prognosis and the associated DL features.

| <b>Feature</b>     | <b>Cox-LASSO coefficient</b> |
|--------------------|------------------------------|
| Dense_Latent_5092  | 0.0752                       |
| Dense_Latent_23965 | 0.1629                       |
| Dense_Latent_34596 | -0.1983                      |
| Dense_Latent_34597 | -0.0995                      |
| Dense_Latent_49309 | 0.1584                       |

**Table S2.** DL risk score model using VGG network for prognosis and the associated DL features.

| <b>Feature</b>   | <b>Cox-LASSO coefficient</b> |
|------------------|------------------------------|
| VGG_Latent_9481  | -0.0763                      |
| VGG_Latent_9482  | -0.2061                      |
| VGG_Latent_21151 | 0.1891                       |
| VGG_Latent_23055 | 0.0385                       |
| VGG_Latent_25064 | -0.0349                      |

**Table S3.** Performance of various radiomics-guided DL models using features extracted from intermediate layers. We used the 80<sup>th</sup>, 150<sup>th</sup>, and 15<sup>th</sup> layers from the last layer for the Yolo, DenseNet201, and VGG19 networks.

| <b>Training</b>   |                     |                  |                |                |
|-------------------|---------------------|------------------|----------------|----------------|
|                   | <b>Hazard ratio</b> | <b>95% CI</b>    | <b>p-value</b> | <b>C-index</b> |
| <b>Yolo</b>       | 4.4436              | 2.0300 - 9.7268  | 0.0004         | 0.7271         |
| <b>DenseNet</b>   | 2.8972              | 1.3376 - 6.2754  | 0.0124         | 0.7250         |
| <b>VGG</b>        | 3.8206              | 1.7645 - 8.2726  | 0.0014         | 0.7226         |
| <b>Test</b>       |                     |                  |                |                |
|                   | <b>Hazard ratio</b> | <b>95% CI</b>    | <b>p-value</b> | <b>C-index</b> |
| <b>Yolo</b>       | 2.1897              | 0.6585 - 7.2817  | 0.3311         | 0.6492         |
| <b>DenseNet</b>   | 2.6842              | 0.8815 - 8.8788  | 0.1893         | 0.6798         |
| <b>VGG</b>        | 3.3727              | 1.0250 - 11.0974 | 0.0897         | 0.7236         |
| <b>Validation</b> |                     |                  |                |                |
|                   | <b>Hazard ratio</b> | <b>95% CI</b>    | <b>p-value</b> | <b>C-index</b> |
| <b>Yolo</b>       | 1.6041              | 0.5500 - 4.6780  | 0.5537         | 0.5192         |
| <b>DenseNet</b>   | 2.7760              | 0.9703 - 7.9416  | 0.1019         | 0.7269         |
| <b>VGG</b>        | 2.1097              | 0.7367 - 6.0418  | 0.2617         | 0.6294         |
