# Supplementary material for: Radiomics-guided deep neural networks stratify lung adenocarcinoma prognosis from CT scans
Source: PubMed Central journal article supplement (PMC8590002; doi:10.1038/s42003-021-02814-7), 2021-11-12
Supplement: 42003_2021_2814_MOESM2_ESM.pdf [file 42003_2021_2814_MOESM2_ESM.pdf]

## Description of Additional Supplementary Files

**File name:** Supplementary Data 1.

**Description:** ICC values for the radiomics features.

**File name:** Supplementary Data 2.

**Description:** Source data for Figure 4.

**File name:** Supplementary Data 3.

**Description:** Source data for all Kaplan-Meier plots.
